# Supplementary material for: Pseudomorphic-phase transformation of NiCo based ternary hierarchical 2D-1D nanostructures for enhanced electrocatalysis
Source: Royal Society of Chemistry journal article supplement (doi:10.1039/c6ta09323j), 2016-12-01
Supplement: c6ta09323j1.pdf [file c6ta09323j1.pdf]

## Supporting Information

# Pseudomorphic-phase transformation of NiCo based ternary hierarchical 2D-1D nanostructures for enhanced electrocatalysis

Wei Yang Lim<sup>a</sup>, Yee-Fun Lim<sup>b</sup>, and Ghim Wei Ho<sup>abc\*</sup>

<sup>a</sup> Department of Electrical and Computer Engineering, National University of Singapore, 4 Engineering Drive 3, Singapore 117583

<sup>b</sup> Institute of Materials Research and Engineering, A\*STAR (Agency for Science, Technology and Research), 2 Fusionopolis Way, Singapore 138634

<sup>c</sup> Engineering Science Programme, National University of Singapore, 9 Engineering Drive 1, Singapore 117575

## Experimental Section

### Reagents and chemicals

Nickel foam, Nickel nitrate ( $\text{Ni}(\text{NO}_3)_2$ ), cobalt nitrate ( $\text{Co}(\text{NO}_3)_2$ ), urea ( $\text{CH}_4\text{N}_2\text{O}$ ), ammonium fluoride ( $\text{NH}_4\text{F}$ ), sodium sulfide ( $\text{Na}_2\text{S}$ ), sulfuric acid ( $\text{H}_2\text{SO}_4$ ) were analytical grade and used as received without further purification.

### Synthesis of 2D nanosheets-1D nanowires Nickel Cobalt hydroxide composite intermediates (NC-H)

NiCo hydroxide was prepared through the following procedures: 219 mg  $\text{Co}(\text{NO}_3)_2$ , 219 mg  $\text{Ni}(\text{NO}_3)_2$ , 148 mg  $\text{NH}_4\text{F}$  and 601 mg Urea were mixed in 25 mL of deionized water and stirred for 10 min. The precursor solution was then transferred to a Teflon-lined stainless steel autoclave of 50 mL capacity and heated at  $100^\circ\text{C}$  for 10 h. A purple precipitate was obtained, washed with water and ethanol for three times successively, and dried for 3 h at  $55^\circ\text{C}$ . A direct growth of same NiCo hydroxide on Ni foam was achieved using the same process, additionally with a Ni foam, sized 2 cm x 3 cm x 2 mm, submerged inside the precursor solution prior to the heating process.

### Synthesis of Nickel Cobalt oxide (NC-O) and sulfide (NC-S)

The formation of NiCo oxide involved an annealing process of as-synthesized NiCo hydroxide, by heating the NC-H powder or NC-H foam at  $400^\circ\text{C}$  for 3 h with a ramp rate of  $5^\circ\text{C}/\text{min}$ . Black products were resulted after the annealing process. On the other hand, NiCo sulfide was formed via a sulfurization process of as-synthesized NiCo hydroxide, by placing the NC-H powder or NC-H foam into a Teflon-lined stainless steel autoclave containing 25 mL 0.1M  $\text{Na}_2\text{S}$  aqueous solution, and heating at  $160^\circ\text{C}$  for 8 h. Black products were obtained, washed with water and ethanol for three time successively, and dried for 3h at  $55^\circ\text{C}$ . NC-S with pure 2D nanosheets was produced in the similar course, except the heating duration was shortened to 3 h.

### Characterization

Field-Emission scanning electron microscopy (FESEM, JEOL FEG JSM 7001F) operated at 15 kV was used to characterize the morphology of the synthesized catalyst. The crystallographic structures of each catalyst were analyzed using X-ray diffraction (XRD, Philips X-ray diffractometer equipped with graphite-monochromated  $\text{Cu-K}\alpha$  radiation at  $\lambda=1.541\text{\AA}$ ) and Transmission electron microscopy (TEM, Phillips FED CM300). X-ray photoelectron spectroscopy (XPS) spectra were obtained on a VG Thermo Escalab 220I-XL system, and all binding energies were referred to C1s peak of 284.8 eV. Diameters of evolved bubbles were measured with the assistance of Phantom Miro 3a10 Camera operated at 2900 frames per second in 1280 x 800 resolution.

### Electrochemical measurements

All electrochemical measurements were carried out using an CHI6001 electrochemical workstation in a three-electrode electrochemical cell containing 0.5 M  $\text{H}_2\text{SO}_4$  aqueous electrolyte at room temperature. Platinum foil and Ag/AgCl electrode were used as counter electrodes and

reference electrode, respectively. The synthesized catalyst-foams were directly used as the working electrode by immersing an area of  $1.5 \text{ cm}^2$  into the electrolyte solution. Polarization curves were obtained using linear sweep voltammetry (LSV) in a potential window of 0 V to -0.6 V versus reversible hydrogen electrode (RHE) with a scan rate of  $5 \text{ mV s}^{-1}$ . Electrochemical impedance spectroscopy (EIS) measurements were conducted in the same electrochemical setup at multiple potentials from 0.1 M to 0.01 Hz with an AC potential amplitude of 5 mV. Cyclic voltammetry (CV) were also conducted in the same electrochemical setup with various scan rate in a potential window of 0 V to -0.1 V versus RHE. The anodic and cathodic current densities were then used to elaborate the capacitance current and capacitance value. To assess the stability of each catalyst-foam, a current variation with time (i-t curve) under constant voltage was scanned for 45 – 70 h 0.5 M  $\text{H}_2\text{SO}_4$  and 1 M KOH, respectively. The applied voltages varied across different catalyst-foam and were chosen to yield an initial current density slightly larger than  $10 \text{ mA cm}^{-2}$ .

Table S1. Comparison of electrocatalytic activities of noble-metal-free HER electrocatalysts.

| Materials                                            | Morphology               | Electrode      | Electrolyte                          | Overpotential (mV)<br>at 10mA cm <sup>-2</sup> | Tafel slope<br>(mV dec <sup>-1</sup> ) | Stability<br>(cycles / hours) | Ref.      |
|------------------------------------------------------|--------------------------|----------------|--------------------------------------|------------------------------------------------|----------------------------------------|-------------------------------|-----------|
| NiCo <sub>2</sub> S <sub>4</sub>                     | nanosheets + nanowires   | Ni foam*       | 0.5 M H <sub>2</sub> SO <sub>4</sub> | 155                                            | 88                                     | 60 h                          | This work |
| MoO <sub>3</sub> /MoS <sub>2</sub>                   | core/shell               | FTO*           | 1 M H <sub>2</sub> SO <sub>4</sub>   | ≈250                                           | 50-60                                  | 10000 in 50 mV/s              | 2         |
| a Co-MoS <sub>3</sub>                                | film                     | FTO*           | 0.5 M H <sub>2</sub> SO <sub>4</sub> | ≈185                                           | 43                                     | -                             | 3         |
| Cu <sub>2</sub> MoS <sub>4</sub>                     | -                        | glassy carbon  | 0.5 M H <sub>2</sub> SO <sub>4</sub> | ≈310                                           | 95                                     | -                             | 4         |
| MoS <sub>2</sub>                                     | film                     | FTO*           | 0.5 M H <sub>2</sub> SO <sub>4</sub> | ≈230                                           | 50                                     | -                             | 5         |
| CoMoS <sub>x</sub>                                   |                          |                |                                      | ≈240                                           | 85                                     |                               |           |
| CoWS <sub>x</sub>                                    | film                     | FTO*           | phosphate buffer                     | ≈270                                           | 78                                     | 2 h                           | 6         |
| NiWS <sub>x</sub>                                    |                          |                |                                      | ≈365                                           | 96                                     |                               |           |
| Fe <sub>0.43</sub> Co <sub>0.57</sub> S <sub>2</sub> | film                     | glassy carbon* | 0.5 M H <sub>2</sub> SO <sub>4</sub> | 185                                            | 56                                     | 1000 in 50 mV/s               | 7         |
| CoSe <sub>2</sub>                                    | film                     |                |                                      | ≈230                                           | 42.4                                   |                               |           |
| Ni <sub>2</sub> P                                    | nanoparticles            | Ti foil        | 0.5 M H <sub>2</sub> SO <sub>4</sub> | 120                                            | 46                                     | 500 in 100 mV/s               | 8         |
| a Co-S                                               | film                     | FTO*           | 1 M phosphate buffer                 | ≈165                                           | 93                                     | 40 h                          | 9         |
| O-doped MoS <sub>2</sub>                             | nanosheets               | glass carbon   | 0.5 M H <sub>2</sub> SO <sub>4</sub> | ≈180                                           | 55                                     | 3000 in 50 mV/s               | 10        |
| Co <sub>0.6</sub> Mo <sub>1.4</sub> N <sub>2</sub>   | aggregated nanoparticles | glassy carbon  | 0.1 M HClO <sub>4</sub>              | ≈200                                           | -                                      | -                             | 11        |
| 1T-WS <sub>2</sub>                                   | exfoliated nanosheets    | glass carbon   | 0.5 M H <sub>2</sub> SO <sub>4</sub> | ≈260                                           | 55                                     | 120 h                         | 12        |
| MoSe <sub>2</sub>                                    | porous film              | glassy carbon  | 0.1 M H <sub>2</sub> SO <sub>4</sub> | 250                                            | 80                                     | 48 h                          | 13        |
| Ni <sub>12</sub> P <sub>5</sub>                      | nanoparticles            | Ti foil        | 0.5 M H <sub>2</sub> SO <sub>4</sub> | 107                                            | 63                                     | ≈3 h                          | 14        |
| WSe <sub>0.96</sub> S <sub>1.04</sub>                | nanotubes                | carbon fiber*  | 1 M H <sub>2</sub> SO <sub>4</sub>   | ≈260                                           | 105                                    | ≈2 h                          | 15        |
| FeP                                                  | hollow nanoparticles     | Ti foil        | 0.5 M H <sub>2</sub> SO <sub>4</sub> | 50                                             | 37                                     | 16 h                          | 16        |
| CoP                                                  | hollow nanoparticles     | Ti foil        | 0.5 M H <sub>2</sub> SO <sub>4</sub> | ≈75                                            | 50                                     | 24 h                          | 17        |
| WS <sub>2</sub>                                      | nanoflakes               | glassy carbon  | 0.5 M H <sub>2</sub> SO <sub>4</sub> | ≈420                                           | 48                                     | 10000 in 10 mV/s              | 18        |

|                                                  |                          |                |                                      |      |      |                  |    |
|--------------------------------------------------|--------------------------|----------------|--------------------------------------|------|------|------------------|----|
| Cu <sub>3</sub> P                                | nanowires array          | Cu foam        | 0.5 M H <sub>2</sub> SO <sub>4</sub> | 143  | 67   | 3000 in 100 mV/s | 19 |
| FeP                                              | nanowires array          | Ti plate       | 0.5 M H <sub>2</sub> SO <sub>4</sub> | 55   | 38   | 3000 in 100 mV/s | 20 |
| MoN                                              | nanosheets               | glassy carbon  | 0.5 M H <sub>2</sub> SO <sub>4</sub> | ≈225 | 90   | 3000 in 50 mV/s  | 21 |
| 1T-WS <sub>2</sub>                               | nanosheets               | graphite       | 0.5 M H <sub>2</sub> SO <sub>4</sub> | 148  | 70   | ≈4 h             | 22 |
| MoP                                              | bulk                     | glassy carbon  | 0.5 M H <sub>2</sub> SO <sub>4</sub> | ≈135 | 54   | 40 h             | 23 |
| CoSe <sub>2</sub>                                | nanoparticles            | carbon fiber*  | 0.5 M H <sub>2</sub> SO <sub>4</sub> | 137  | 42.1 | 60 h             | 24 |
| CoP                                              | nanowires array          | carbon fiber*  | 0.5 M H <sub>2</sub> SO <sub>4</sub> | 67   | 51   | 5000 in 100 mV/s | 25 |
|                                                  |                          |                | 1 M KOH                              | 209  | 129  | -                |    |
| CoS <sub>2</sub>                                 | microwires array         | glassy carbon  | 0.5 M H <sub>2</sub> SO <sub>4</sub> | 145  | 51.4 | 40 h             | 26 |
| Co <sub>2</sub> P                                | nanorods                 | Ti foil        | 0.5 M H <sub>2</sub> SO <sub>4</sub> | 134  | 51.7 | 12 h             | 27 |
| Co <sub>9</sub> S <sub>8</sub> /C                | core/shell               | glassy carbon  | 0.5 M H <sub>2</sub> SO <sub>4</sub> | 240  |      |                  | 28 |
|                                                  |                          |                | 1 M KOH                              | 250  | -    | 10 h             |    |
|                                                  |                          |                | 1 M phosphate buffer                 | 280  |      |                  |    |
| CoP/CoPO <sub>4</sub>                            | film                     | glass, Si, Fe* | 0.5 M H <sub>2</sub> SO <sub>4</sub> | ≈150 | 53   | ≈14 h            | 29 |
| Co <sub>9</sub> S <sub>8</sub> /MoS <sub>2</sub> | core/shell               | carbon fiber*  | 0.5 M H <sub>2</sub> SO <sub>4</sub> | 190  | 110  | 12 h             | 30 |
| NiS                                              | cubic nanoframes         | Ni foam        | 1 M KOH                              | 94   | 139  | 16 h             | 31 |
| WO <sub>2</sub> /C                               | mesoporous nanowires     | glassy carbon  | 0.5 M H <sub>2</sub> SO <sub>4</sub> | 58   | 46   | 10 h             | 32 |
| Ni <sub>3</sub> S <sub>2</sub>                   | nanosheets array         | Ni foam*       | neutral                              | 170  |      | 200 h            | 33 |
|                                                  |                          |                | 1 M NaOH                             | 223  | -    | 150 h            |    |
| α-Fe-Ni-S                                        | nanosheets               | glassy carbon  | 0.5 M H <sub>2</sub> SO <sub>4</sub> | 105  | 40   | 39 h             | 34 |
| NiS                                              | rod-shaped nanoparticles | glassy carbon  | 0.5 M H <sub>2</sub> SO <sub>4</sub> | ≈260 | 88   | 5000 in 50 mV/s  | 35 |
| MoS <sub>2</sub> /CoSe <sub>2</sub>              | nanosheets/nanobelts     | glassy carbon  | 0.5 M H <sub>2</sub> SO <sub>4</sub> | ≈75  | 36   | 24 h             | 36 |
| WO <sub>2.9</sub>                                | nanoparticles            | glassy carbon  | 0.5 M H <sub>2</sub> SO <sub>4</sub> | 70   | 50   | 10000 in 5 mV/s  | 37 |
| Ni-Mo-S                                          | nanosheets               | carbon fiber*  | 0.5 M phosphate buffer               | 200  | 85.3 | ≈8 h             | 38 |
| NiFe/NiCo <sub>2</sub> O <sub>4</sub>            | nanosheets/nanoflakes    | Ni foam*       | 1 M KOH                              | 105  | 88   | 10 h             | 39 |
| NiCo <sub>2</sub> S <sub>4</sub>                 | nanowires array          | Ni foam*       | 1 M KOH                              | 210  | 58.9 | 50 h             | 40 |

|                                                    |                  |          |                                      |     |      |      |    |
|----------------------------------------------------|------------------|----------|--------------------------------------|-----|------|------|----|
| NiS                                                | microspheres     | Ni foam* | 1 M KOH                              | 158 | 83   | 20 h | 41 |
| Zn <sub>0.3</sub> Co <sub>2.7</sub> S <sub>4</sub> | hollow framework | -        | 0.5 M H <sub>2</sub> SO <sub>4</sub> | 80  | 47.5 | 60 h | 42 |
| Ni <sub>3</sub> S <sub>2</sub>                     | leaves           | Ni foam* | 1 M KOH                              | 182 | 89   | 12 h | 43 |

\*direct assembly on electrode

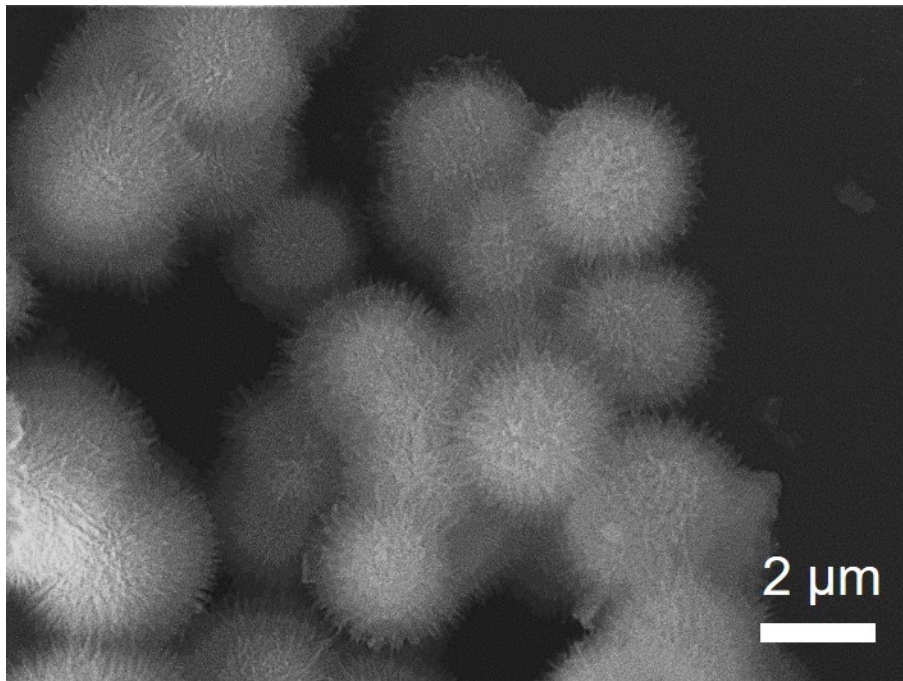

Figure S1. SEM image of self-assembled microspheres with 1D nanowires NiCo-(OH)<sub>2</sub> synthesized without the presence of ammonium fluoride.

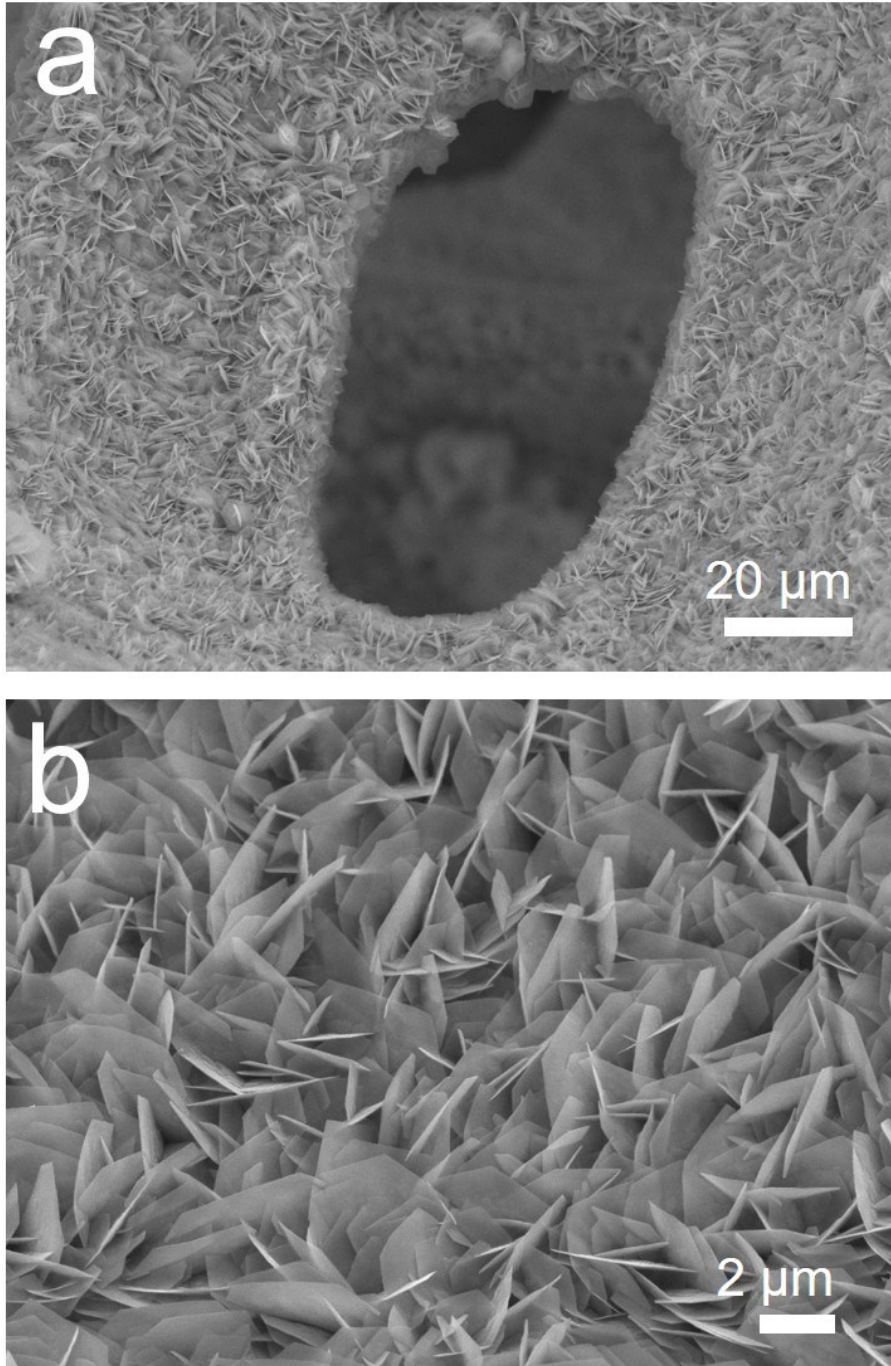

Figure S2. SEM images in (a) low magnification and (b) high magnification of Nickel Cobalt hydroxides directly grown on nickel foam at growth duration of 3 h.



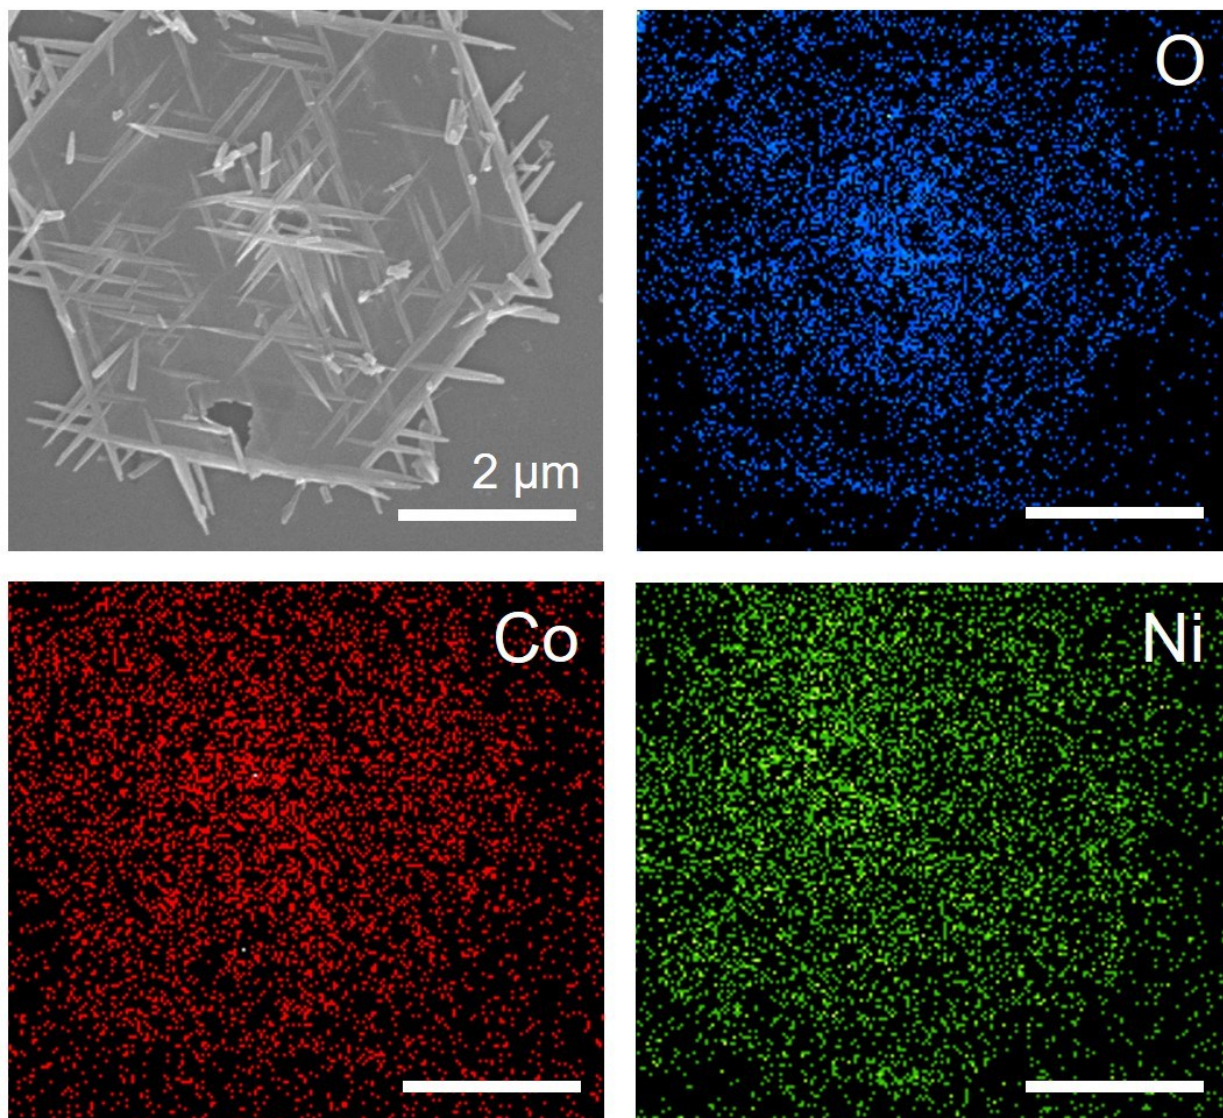

Figure S3. Energy Dispersive X-ray (EDX) mapping of uniformly distributed Co, Ni and O elements of NC-H.

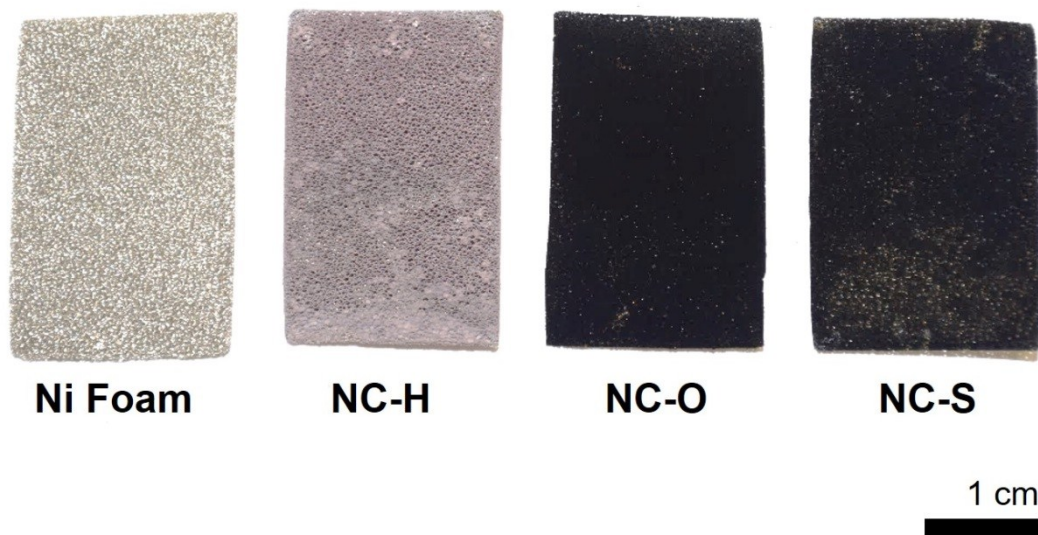

Figure S4. Digital photos of nickel foam and nickel foam grown with NC-H, NC-O and NC-S, respectively.

The Ni 2p XPS spectra Ni 2p peaks split into Ni 2p<sub>3/2</sub> (855.6 eV) and Ni 2p<sub>1/2</sub> (873.1 eV), accompanied by satellite lines at 861.6 eV and 879.9 eV respectively; Co 2p peaks split into Co 2p<sub>3/2</sub> (781.3 eV) and Co 2p<sub>1/2</sub> (797.4 eV), accompanied by satellite lines at 785.9 eV and 803.1 eV respectively.

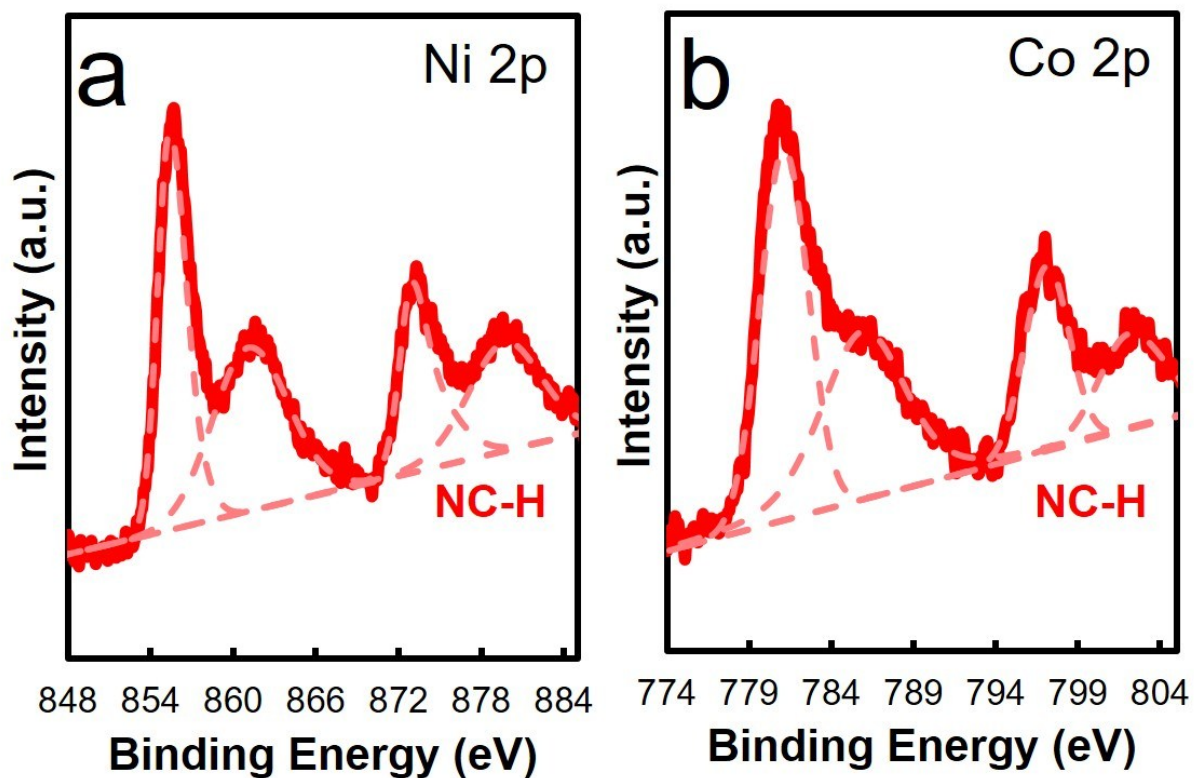

Figure S5. XPS spectra of NC-H on (a) Ni 2p core and (b) Co 2p core levels.

The Co 2p XPS spectrum shows two spin-orbit doublets: the binding energies at 778.8 eV for Co 2p<sub>1/2</sub> and 793.7 eV for Co 2p<sub>3/2</sub> with spin-orbiting splitting values of 15.1 eV are spin-orbit characteristic of Co<sup>3+</sup>, while the binding energies at 781.6 eV for Co 2p<sub>1/2</sub> and 797.3 eV for Co 2p<sub>3/2</sub> with spin-orbiting splitting value of 16.3 eV are spin-orbit characteristic of Co<sup>2+</sup>. The weak satellite peaks indicate that the majority of Co atoms were in the Co<sup>3+</sup> state.

The Ni 2p XPS spectrum shows two spin-orbit doublets: the binding energies at 853.2 eV for Ni 2p<sub>3/2</sub> and 872.6 eV for Ni 2p<sub>1/2</sub> are spin-orbit characteristics of Ni<sup>2+</sup>, while the binding energies at 856.2 eV for Ni 2p<sub>3/2</sub> and 874.4 eV for Ni 2p<sub>1/2</sub> are spin-orbit characteristics of Ni<sup>3+</sup>. Likewise, an intense satellite peak suggested that the Ni state was predominant in the Ni<sup>2+</sup> state.<sup>1</sup>

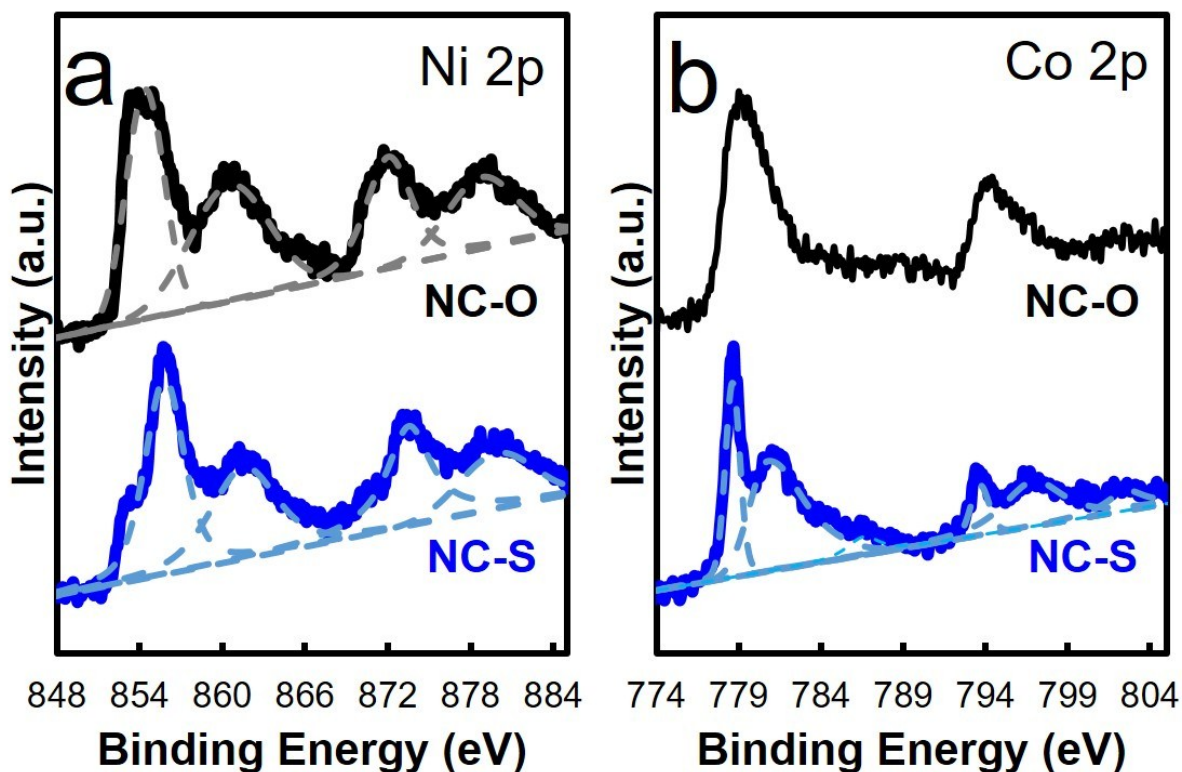

Figure S6. XPS spectra of NC-O and NC-S on (a) Ni 2p and (b) Co 2p core levels.



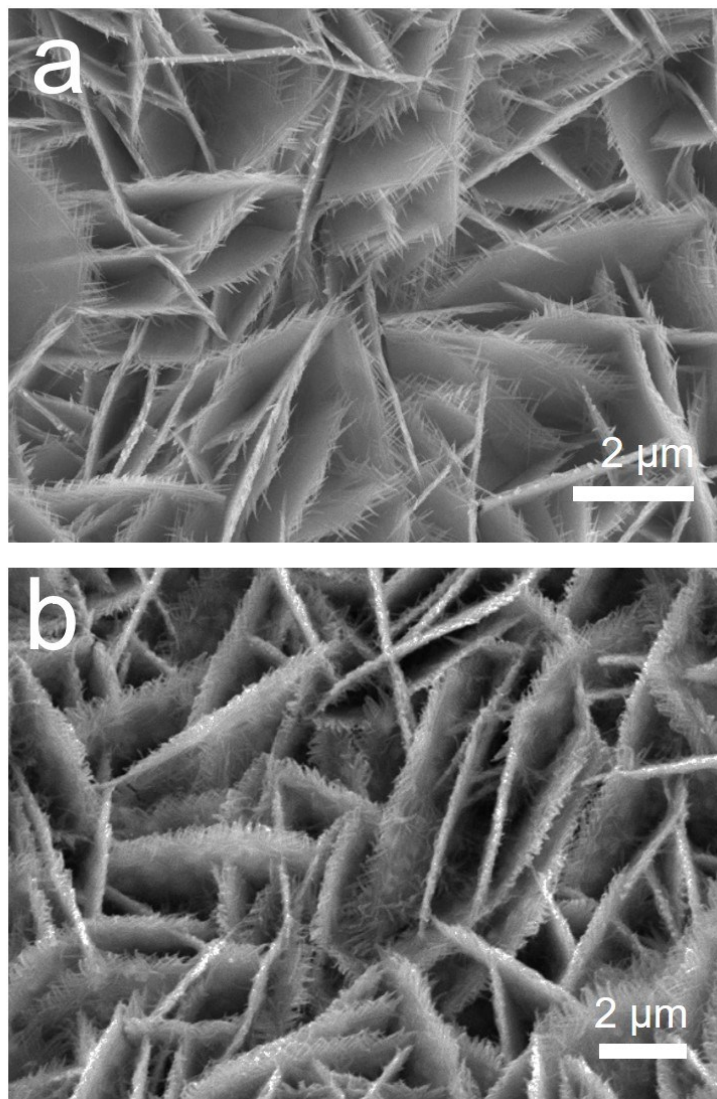

Figure S7. SEM images of (a) NC-O and (b) NC-S directly grown on nickel foam.

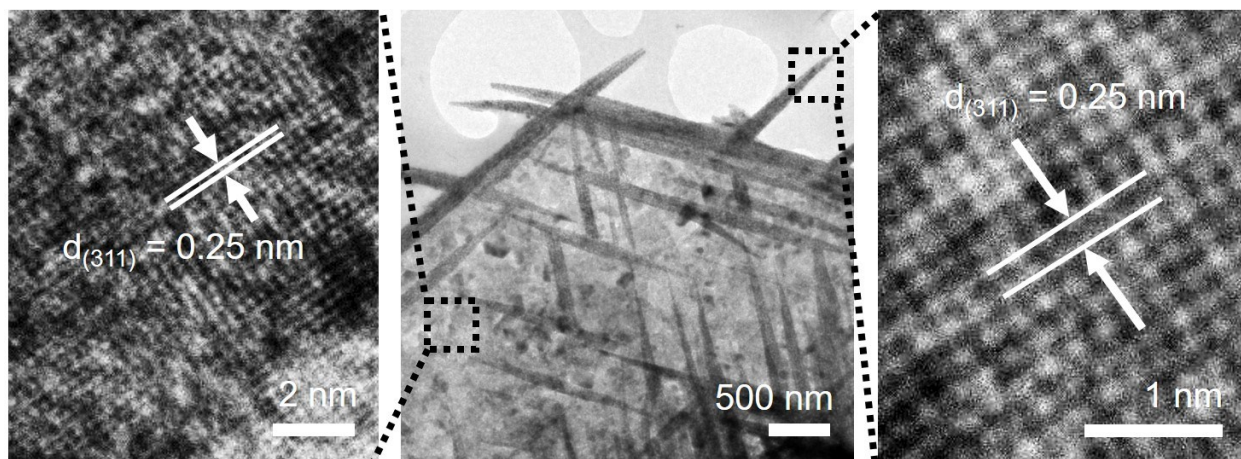

Figure S8. TEM images of NC-O and HRTEM images of nanosheets and nanowires, showing clear crystal fringes with 0.25 nm spacing, corresponding to interplanar distance of (311) plane of NiCo<sub>2</sub>O<sub>4</sub>.

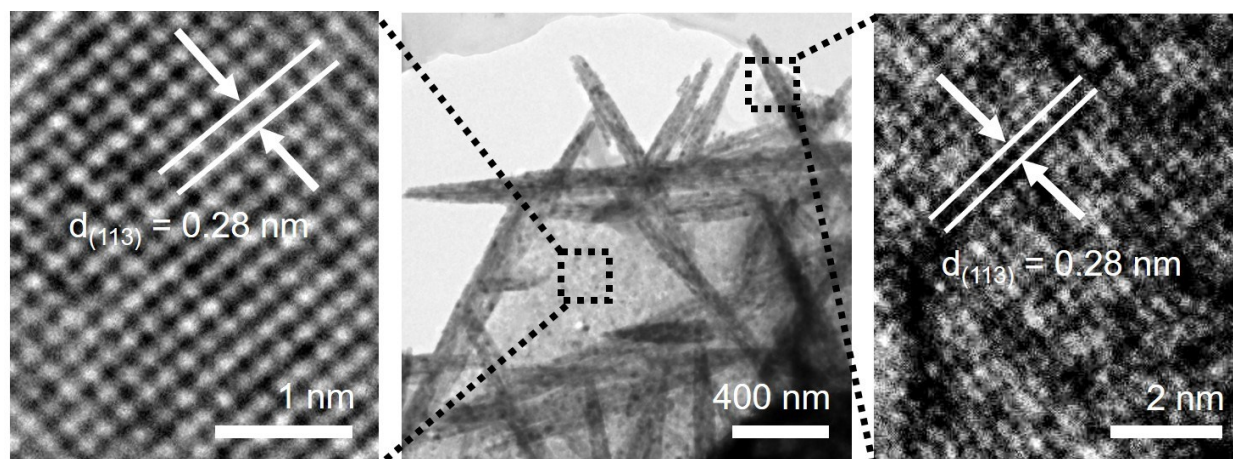

Figure S9. TEM images of NC-S and HRTEM images of nanosheets and nanowires, showing clear crystal fringes with 0.28 nm spacing, corresponding to interplanar distance of (113) plane of  $\text{NiCo}_2\text{S}_4$ .

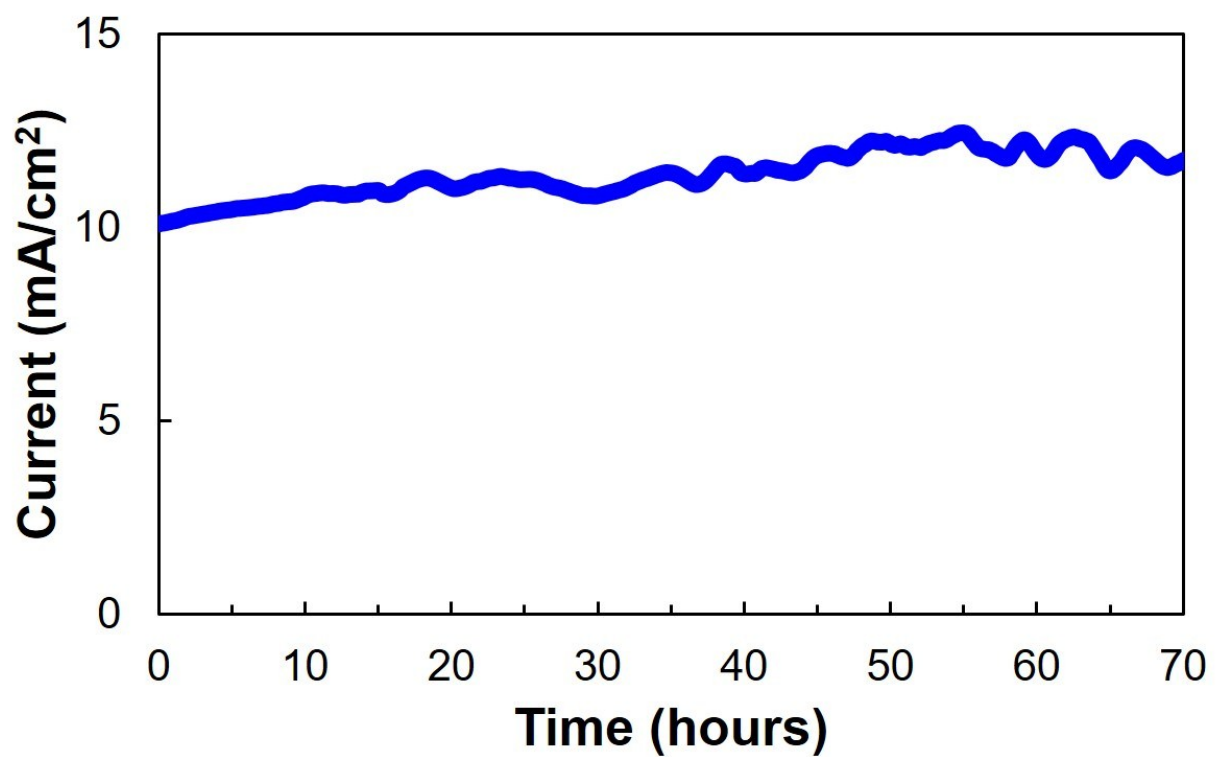

Figure S10. Chronoamperometry test (i-t curve) of NC-S in acidic electrolyte of 0.5 M H<sub>2</sub>SO<sub>4</sub> at current density of 10 mA cm<sup>-2</sup> up to 60 h for stability assessment.



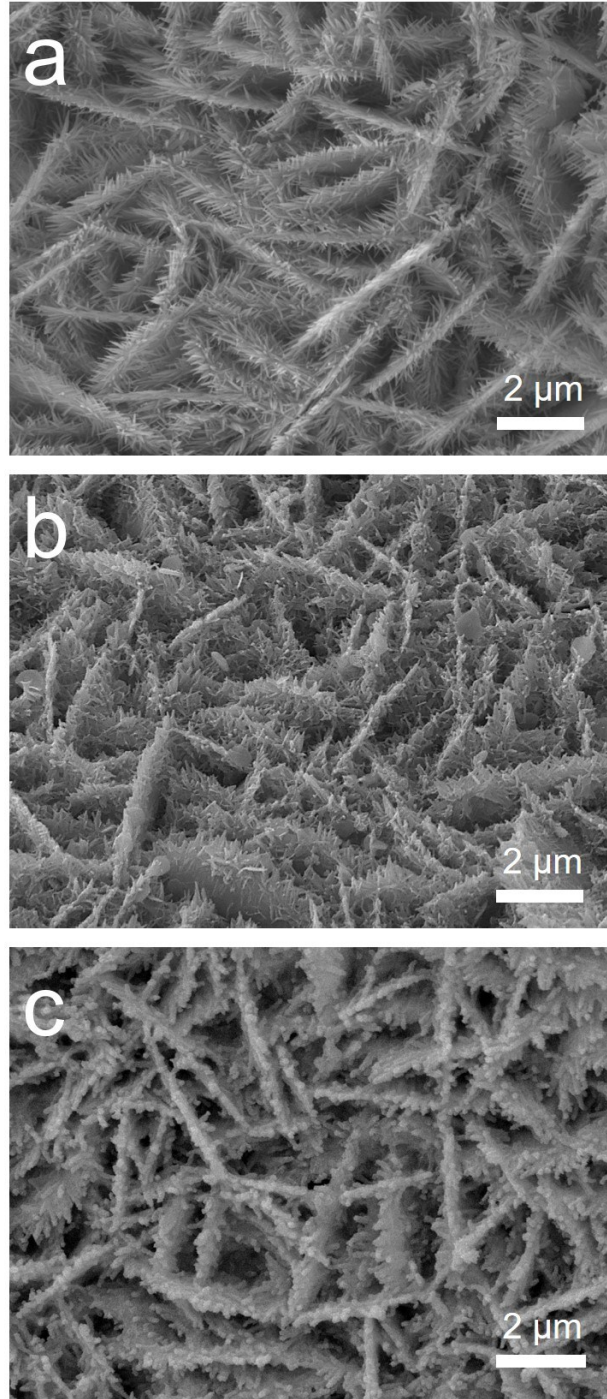

Figure S11. SEM images of (a) NC-H, (b) NC-O and (c) NC-S on Ni foam after a chronoamperometry test for stability assessment.

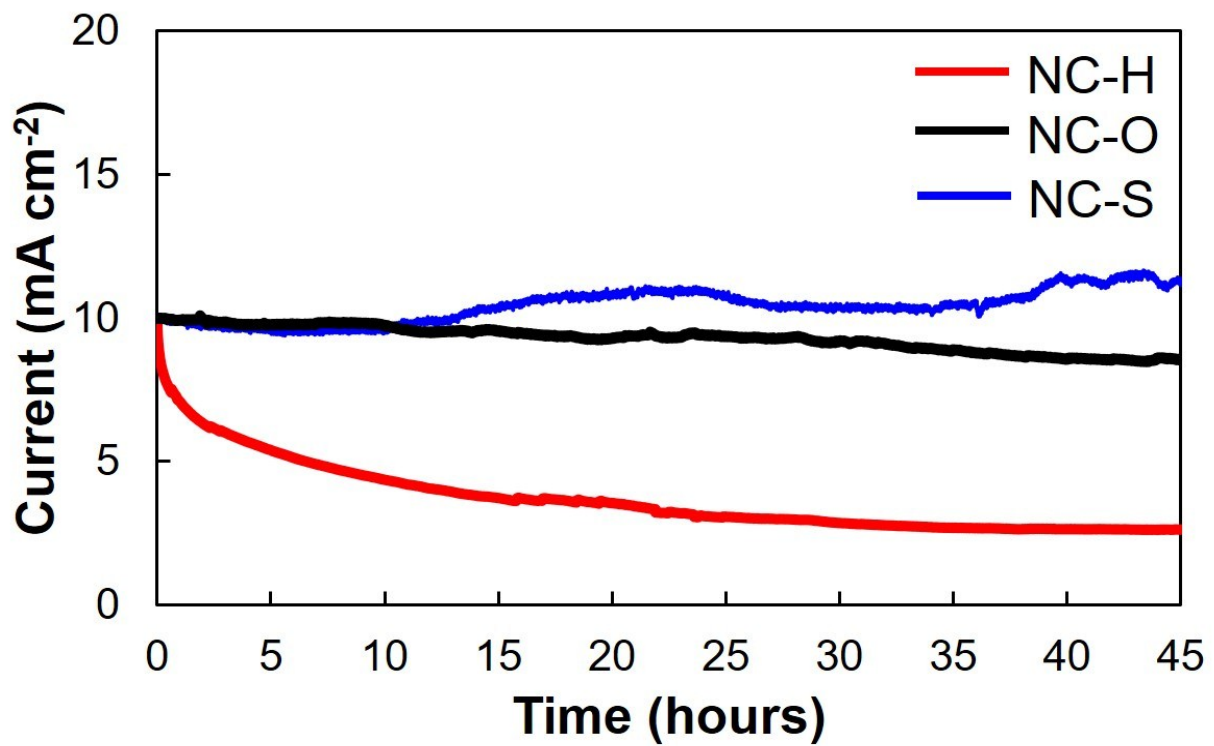

Figure S12. Chronoamperometry test (i-t curve) of NC-H, NC-O and NC-S in basic electrolyte of 1 M KOH at current density of 10 mA cm<sup>-2</sup> up to 45 h for stability assessment.

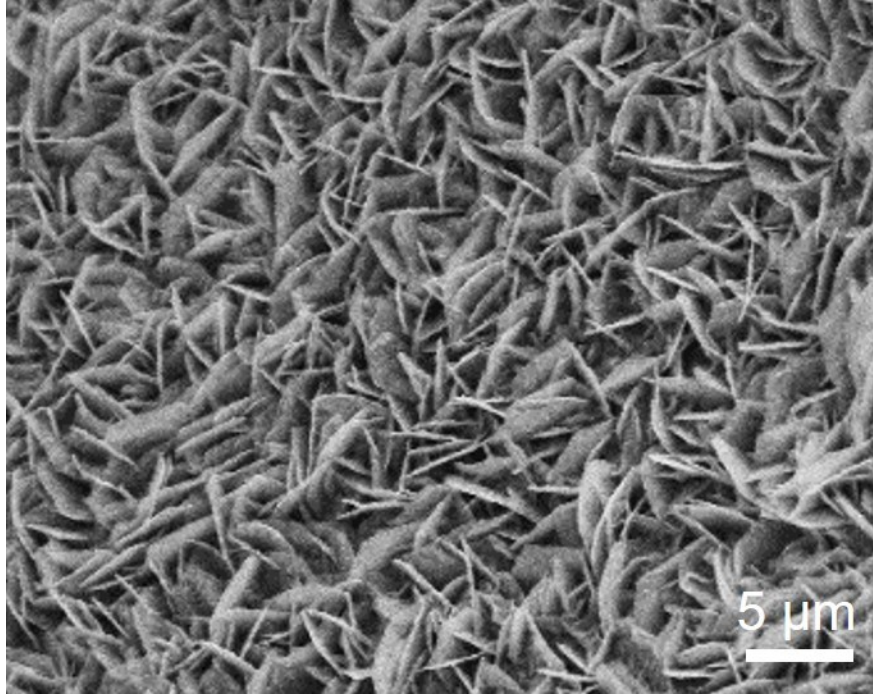

Figure S13. SEM images of NC-S2 (Nickel Cobalt sulfide with 2D nanosheets, transformed from Nickel Cobalt hydroxides directly grown on nickel foam at growth duration of 3 h, sees Figure S2).

## Reference

- 1 A. Sivanantham, P. Ganesan, S. Shanmugam, *Adv. Funct. Mater.*, 2016, **26**, 4661-4672.
- 2 Z. Chen., D. Cummins, B. N. Reinecke, E. Clark, M. K. Sunkara, T. F. Jaramillo, *Nano Lett.*, 2011, **11**, 4168-4175
- 3 D. Merki, H. Vrubel, L. Rovelli, S. Fierro, X. Hu, *Chem. Sci.*, 2012, **3**, 2515-2525
- 4 P. D. Tran, M. Nguyen, S. S. Pramana, A. Bhattacharjee, S. Y. Chiam, J. Fize, M. J. Field, V. Artero, L. H. Wong, J. Loo, J. Barber, *Energy Environ. Sci.*, 2012, **5**, 8912-8916,
- 5 J. Kibsgaard, Z. Chen, B. N. Reinecke, T. F. Jaramillo, *Nat. Mater.*, 2012, 963-969
- 6 P. D. Tran , S. Y. Chiam, P. P. Boix, Y. Ren, S. S. Pramana, J. Fize, V. Artero, J. Barber, *Energy Environ. Sci.*, 2013, **6**, 2452-2459
- 7 D. Kong, J. J. Cha, H. Wang, H. R. Lee, Y. Cui, *Energy Environ. Sci.*, 2013, **6**, 3553-3558
- 8 E. J. Popczun, J. R. Mckone, C. G. Read, A. J. Biacchi, A. M. Wilttrout, N. S. Lewis, R. E. Schaak, *J. Am. Chem. Soc.*, 2013, **135**, 9267-9270
- 9 Y. Sun, C. Liu, D. C. Grauer, J. Yano, J. R. Long, P. Yang, C. J. Chang, *J. Am. Chem. Soc.*, 2013, **135**, 17699-17702
- 10 J. Xie, J. Zhang, S. Li, F. Grote, X. Zhang, H. Zhang, R. Wang, Y. Lei, B. Pan, Y. Xie, *J. Am. Chem. Soc.*, 2013, **135**, 17881-17888
- 11 B. Cao, G. M. Veith, J. C. Neuefeind, R. R. Adzic, P. G. Khalifah, *J. Am. Chem. Soc.*, 2013, **135**, 19186-19192
- 12 D. Voiry, H. Yamaguchi, J. Li, R. Silva, D. C. B. Alves, T. Fujita, M. Chen, T. Asefa, V. B. Shenoy, G. Eda, M. Chhowalla, *Nat. Mater.*, 2013, **12**, 850-855
- 13 F. H. Saadi, A. I. Carim, J. M. Velazquez, J. H. Baricuatro, C. C. L. McCrory, M. P. Soriaga, N. S. Lewis, *ACS Catal.*, 2014, **4**, 2866-2873
- 14 Z. Huang, Z. Chen, Z. Chen, C. Lv, H. Meng, C. Zhang, *ACS Nano*, 2014, **8**, 8121-8129
- 15 K. Xu, F. Wang, Z. Wang, X. Zhan, Q. Wang, Z. Cheng, M. Safdar, J. He, *ACS Nano*, 2014, **8**, 8468-8476
- 16 J. F. Callejas, J. M. McEnaney, C. G. Read, J. C. Crompton, A. J. Biacchi, E. J. Popczun, T. R. Gordon, N. S. Lewis, R. E. Schaak, *ACS Nano*, 2014, **8**, 11101-11107
- 17 E. J. Popczun, C. G. Read, C. W. Roske, N. S. Lewis, Y. E. Schaak, *Angew. Chem. Int. Ed.*, 2014, **53**, 5427-5430
- 18 L. Cheng, W. Huang, Q. Gong, C. Liu, Z. Liu, Y. Li, H. Dai, *Angew. Chem. Int. Ed.*, 2014, **53**, 7860-7863
- 19 J. Tian, Q. Liu, N. Cheng, A. M. Asiri, *Angew. Chem. Int. Ed.*, 2014, **53**, 9577-9581
- 20 P. Jiang, Q. Liu, Y. Liang, J. Tian, A. M. Asiri, X. Sun, *Angew. Chem. Int. Ed.*, 2014, **53**, 12855-12859
- 21 J. Xie, S. Li, X. Zhang, J. Zhang, R. Wang, H. Zhang, B. Pan, Y. Xie, *Chem. Sci.*, 2014, **5**, 4615-4620
- 22 M. A. Lukowski, A. S. Daniel, C. R. English, F. Meng, A. Forticaux, R. J. Hamers, S. Jin, *Energy Environ. Sci.*, 2014, **7**, 2608-2613
- 23 P. Xiao, M. A. Sk, L. Thia, X. Ge, R. J. Lim, J.-Y. Wang, K. H. Lim, X. Wang, *Energy Environ. Sci.*, 2014, **7**, 2624-2629
- 24 D. Kong, H. Wang, Z. Lu, Y. Cui, *J. Am. Chem. Soc.*, 2014, **136**, 4897-4900

- 25 J. Tian, Q. Liu, A. M. Asiri, X. Sun, *J. Am. Chem. Soc.*, 2014, 136, 7587-7590
- 26 M. S. Faber, R. Dziedzic, M. A. Lukowski, N. S. Kaiser, Q. Ding, S. Jin, *J. Am. Chem. Soc.*, 2014, 136, 10053-10061
- 27 Z. Huang, Z. Chen, Z. Chen, C. Lv, M. G. Humphrey, C. Zhang, *Nano Energy*, 2014, 9, 373-382
- 28 L.-L. Feng, G.-D. Li, Y. Liu, Y. Wu, H. Chen, Y. Wang, Y.-C. Zou, D. Wang, X. Zou, *ACS Appl. Mater. Interfaces*, 2015, 7, 980-988
- 29 Y. Yang, H. Fei, G. Ruan, J. M. Tour, *Adv. Mater.*, 2015, 27, 3175-3180
- 30 H. Zhu, J. Zhang, R. Yanzhang, M. Du, Q. Wang, G. Gao, J. Wu, G. Wu, M. Zhang, B. Liu, J. Yao, X. Zhang, *Adv. Mater.*, 2015, 27, 4752-4759
- 31 X.-Y. Yu, L. Yu, H. B. Wu, X. W. Lou, *Angew. Chem. Int. Ed.*, 2015, 54, 5331-5335
- 32 R. Wu, J. Zhang, Y. Shi, D. Liu, B. Zhang, *J. Am. Chem. Soc.*, 2015, 137, 6983-6986
- 33 L.-L. Feng, G. Yu, Y. Wu, G.-D. Li, H. Li, Y. Sun, T. Asefa, W. Chen, X. Zou, *J. Am. Chem. Soc.*, 2015, 137, 14023-14026
- 34 M. D. Greengalgh, S. P. Thomas, *J. Am. Chem. Soc.*, 2015, 138, 11900-11903
- 35 D. Y. Chung, J. W. Han, D.-H. Lim, J.-H. Jo, S. J. Yoo, H. Lee, Y.-E. Sung, *Nanoscale*, 2015, 7, 5157-5163
- 36 M.-R. Gao, J.-X. Liang, Y.-R. Zheng, Y.-F. Xu, J. Jiang, Q. Gao, J. li, S.-H. Yu, *Nat. Commun.*, 2015, 6, 5982
- 37 Z.-F. Huang, J. Song, K. Li, M. Tahir, Y.-T. Wang, L. Pan, L. Wang, X. Zhang, J.-J. Zou, *Nat. Commun.*, 2015, 6, 8064
- 38 J. Miao, F.-X. Xiao, H. B. Yang, S. Y. Khoo, J. Chen, Z. Fan, Y.-Y. Hsu, H. M. Chen, H. Zhang, B. Liu, *Sci. Adv.*, 2015, 1:e1500259
- 39 C. Xiao, Y. Li, X. Lu, C. Zhao, *Adv. Funct. Mater.*, 2016, 26, 3515-3523
- 40 A. Sivanantham, P. Ganesan, S. Shanmugam, *Adv. Funct. Mater.*, 2016, 26, 4661-4672
- 41 W. Zhu, X. Yue, W. Zhang, S. Yu, Y. Zhang, J. Wang, J. Wang, *Chem. Commun.*, 2016, 52, 1486-1489
- 42 Z.-F. Huang, J. Song, K. Li, M. Tahir, Y.-T. Wang, L. Pan, L. Wang, X. Zhang, J.-J. Zou, *J. Am. Chem. Soc.*, 2016, 138, 1359-1365
- 43 T. Zhu, L. Zhu, J. Wang, G. W. Ho, *J. Mater. Chem. A.*, 2016, 4, 13916-13922
